# Supplementary material for: Modulation of HIV Replication in Monocyte-Derived Macrophages (MDM) by Host Antiviral Factors Secretory Leukocyte Protease Inhibitor and Serpin Family C Member 1 Induced by Steroid Hormones
Source: MDPI journal article supplement (doi:10.3390/v14010095), 2022-01-06
Supplement: s1 [file s1]

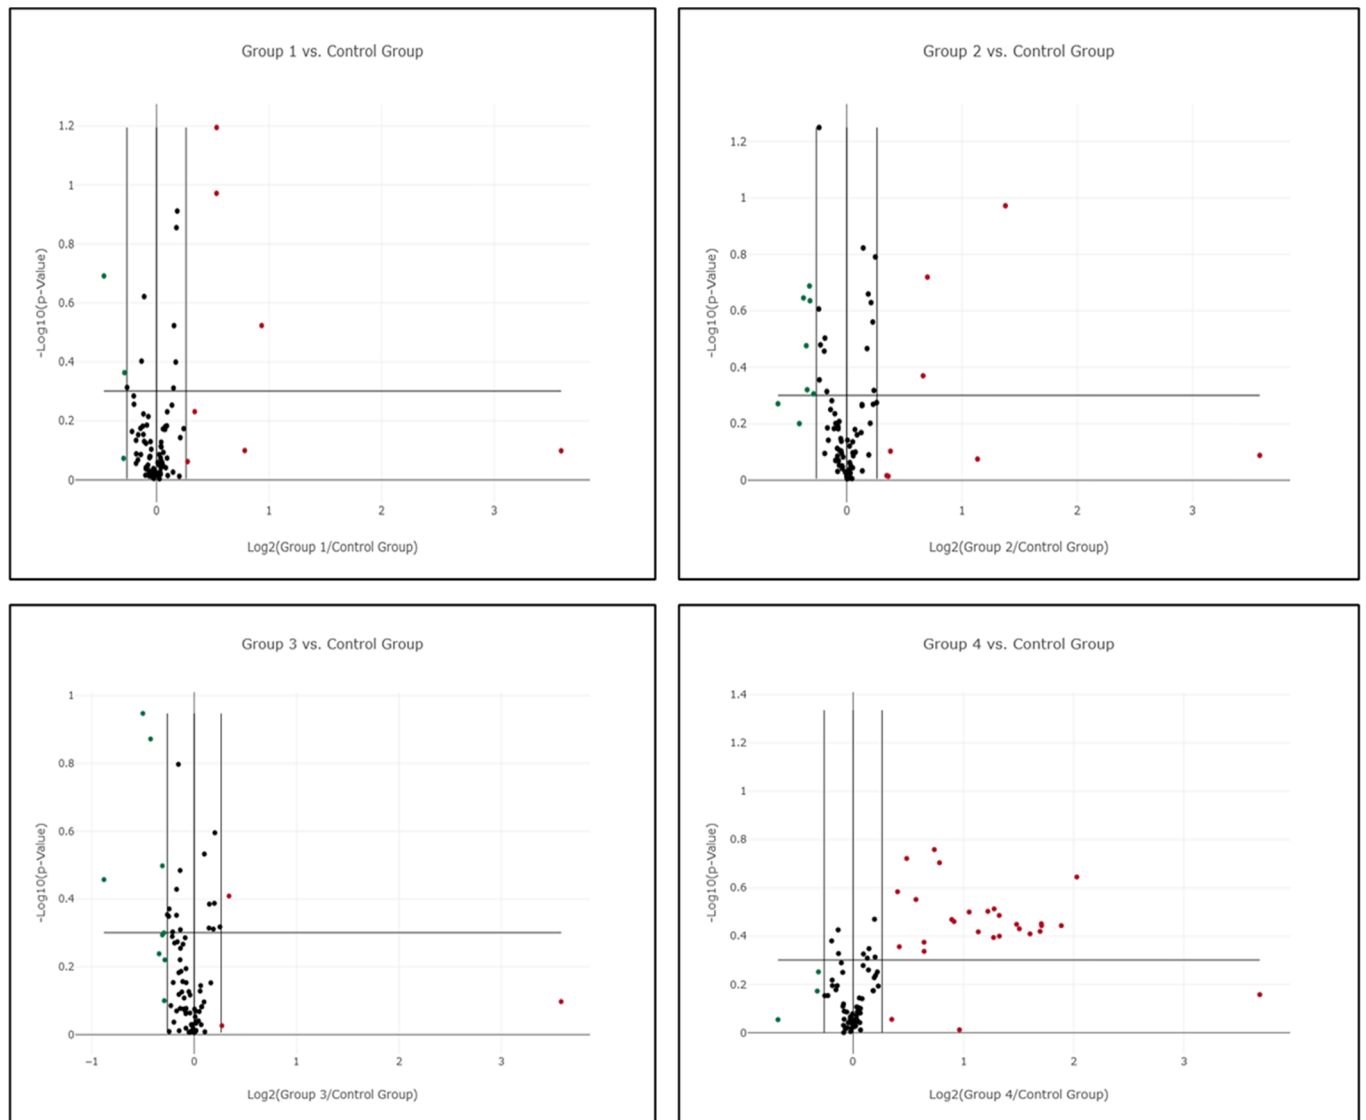

**Figure S1:** Volcano plots of significant gene, expression fold change for estrogen or progesterone treated HIV-1 infected MDMs in comparison to untreated HIV-1 infected MDMs as control: The plot shows differentially regulated genes with statistical significance that passed Volcano Plot filtering (Fold Change  $\geq 1.2$  and p-value  $\leq 0.5$ ). The Volcano Plot identifies significant gene expression changes by plotting the log2 of the fold changes in gene expression on the x-axis versus their statistical significance on the y-axis. The center vertical line indicates unchanged gene expression, while the two outer vertical lines indicate the selected fold regulation threshold. The horizontal line indicates the selected p-value threshold. The red point in the plot represents up regulated genes and green point in the plot represents down regulated genes with statistical significance ( $\leq 0.5$ ).

Group 1 represented as 40pM estrogen treated MDMs infected with HIV-1

Group 2 represented as 110nM estrogen treated MDMs infected with HIV-1

Group 3 represented as 2.5nM progesterone treated MDMs infected with HIV-1

Group 3 represented as 64nM progesterone treated MDMs infected with HIV-1

Control group represent as MDMs infected with HIV-1

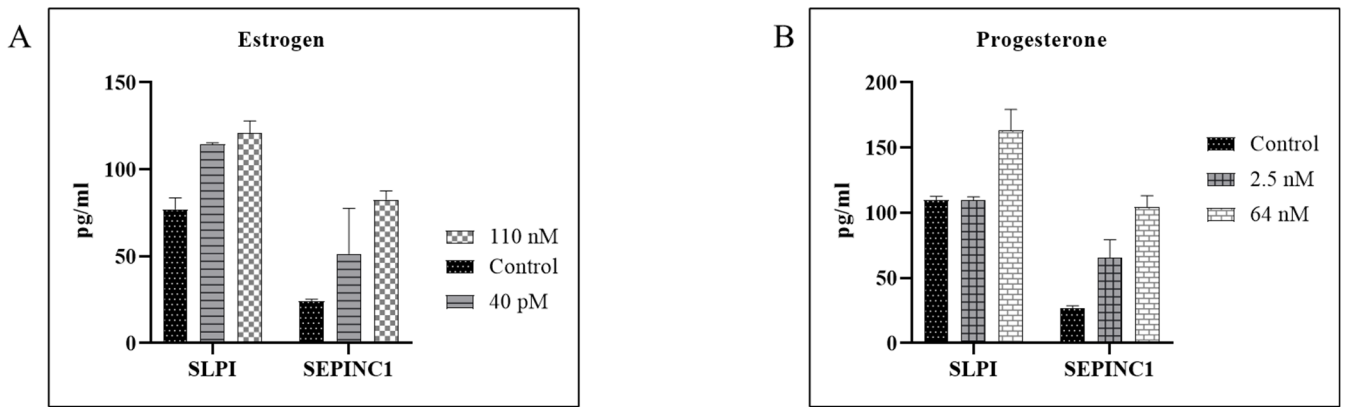

**Figure S2: Validation of Protein expression in Estrogen or Progesterone Treated MDMs Infected with HIV-1 (Donor 2).** (A). BioPlex analysis of secreted Secretory Leukocyte Peptidase Inhibitor (SLPI) and Serine Proteinase Inhibitor Clade C Member 1 (SERPIN C1) in culture supernatants from monocytes derived macrophage cells infected with HIV-1 (BaL) pre-treated with 40 pM or 110 nM estrogen (A) or 2.5 nM or 64 nM progesterone (B) and not pre-treated with estrogen or progesterone as control. Culture supernatants were analyzed in duplicate. Culture supernatants were analyzed in triplicate. Results expressed as mean  $\pm$  SEM of three independent experimental set up of Donor 2

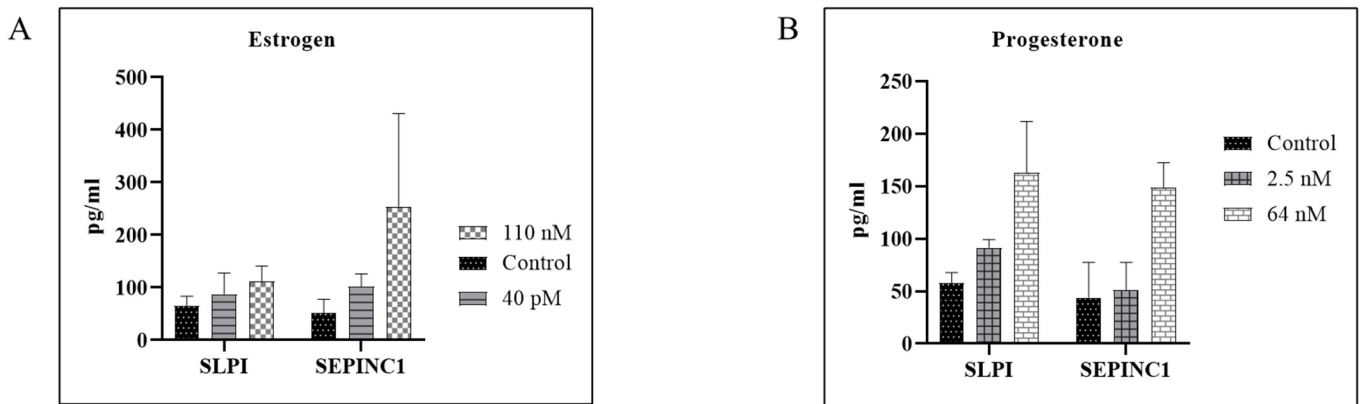

**Figure S3: Validation of Protein expression in Estrogen or Progesterone Treated MDMs Infected with HIV-1 (Donor 3).** (A). BioPlex analysis of secreted Secretory Leukocyte Peptidase Inhibitor (SLPI) and Serine Proteinase Inhibitor Clade C Member 1 (SERPIN C1) in culture supernatants from monocytes derived macrophage cells infected with HIV-1 (BaL) pre-treated with 40 pM or 110 nM estrogen (A) or 2.5 nM or 64 nM progesterone (B) and not pre-treated with estrogen or progesterone as control. Culture supernatants were analyzed in duplicate. Culture supernatants were analyzed in triplicate. Results expressed as mean  $\pm$  SEM of three independent experimental set up of Donor 3

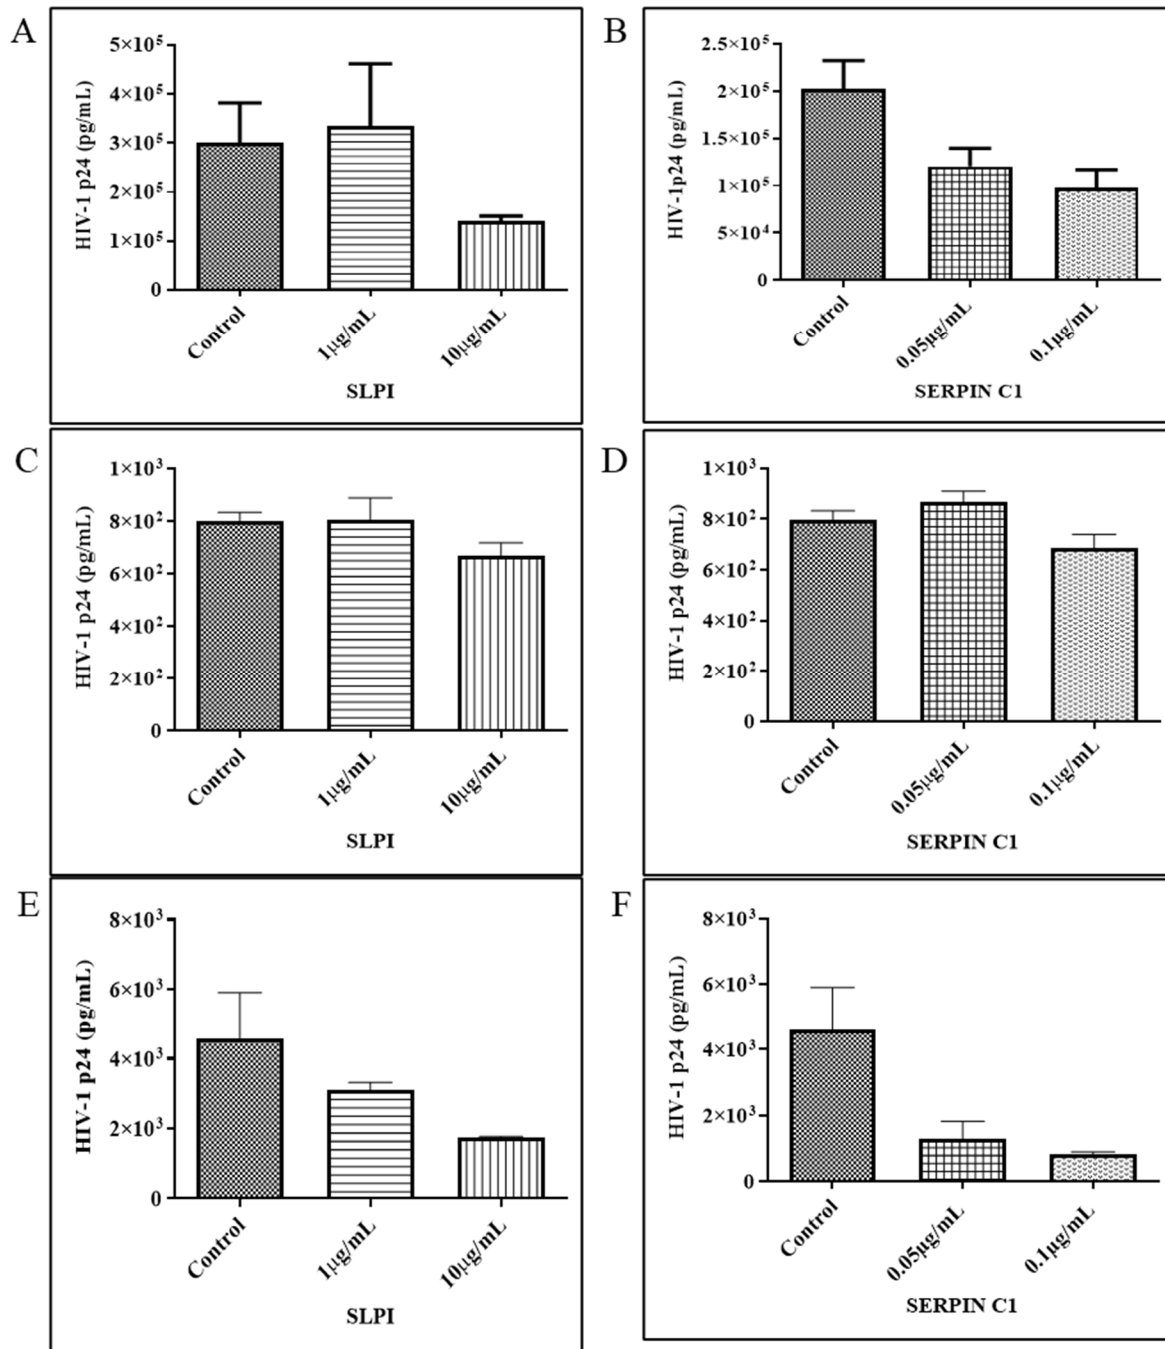

**Figure S4: HIV-1 Replication in Pre-treated MDMs (A & B), Post HIV-1 infected MDMs (C & D) and -MDMs infected with pre-incubated inoculum- (E & F) treated with SLPI and SERPINC1 (Donor 2).**

(A&B) MDMs (1x10<sup>6</sup> cells/well) were pre-treated with (A) SLPI 1 μg/ml and 10 μg/ml or (B) SERPIN C1 0.05 μg/ml and 0.1 μg/ml concentration for 3 hours then infected with HIV-1 BaL 5 ng/ml p24 units. After 2 hours the virus was removed, and fresh culture media added with 1 μg/ml and 10 μg/ml SLPI or 0.05 μg/ml and 0.1 μg/ml SERPINC1 and cultured. (C&D) MDMs (1x10<sup>6</sup> cells/well) were infected with HIV-1 BaL 5 ng/ml p24 units. After 2 hours the virus was removed, and fresh culture media added with (C) SLPI 1 μg/ml and 10 μg/ml concentration or (D) SERPIN C1 0.05 μg/ml and 0.1 μg/ml and cultured the MDMs. (E&F) HIV-1 BaL (5 ng/ml p24 units) was incubated without or with (E) SLPI 1 μg/ml and 10 μg/ml or (F) SERPIN C1 0.05 μg/ml and 0.1 μg/ml at 37 °C for 2 h in PBS containing 0.1% BSA. After that, MDMs (5x10<sup>5</sup> cells/well) were infected with HIV-1 BaL and incubated at 37 °C for 2 h for virus adsorption washed with phosphate buffered saline (PBS) and cultured in 2 ml fresh media at 37 °C.

Culture supernatants were collected after 7 days post infection and HIV-1 replication quantitated by HIV-1 p24 ELISA. Culture supernatants were analyzed in triplicate. Results expressed as mean ± SEM of three independent experimental set up of Donor 2

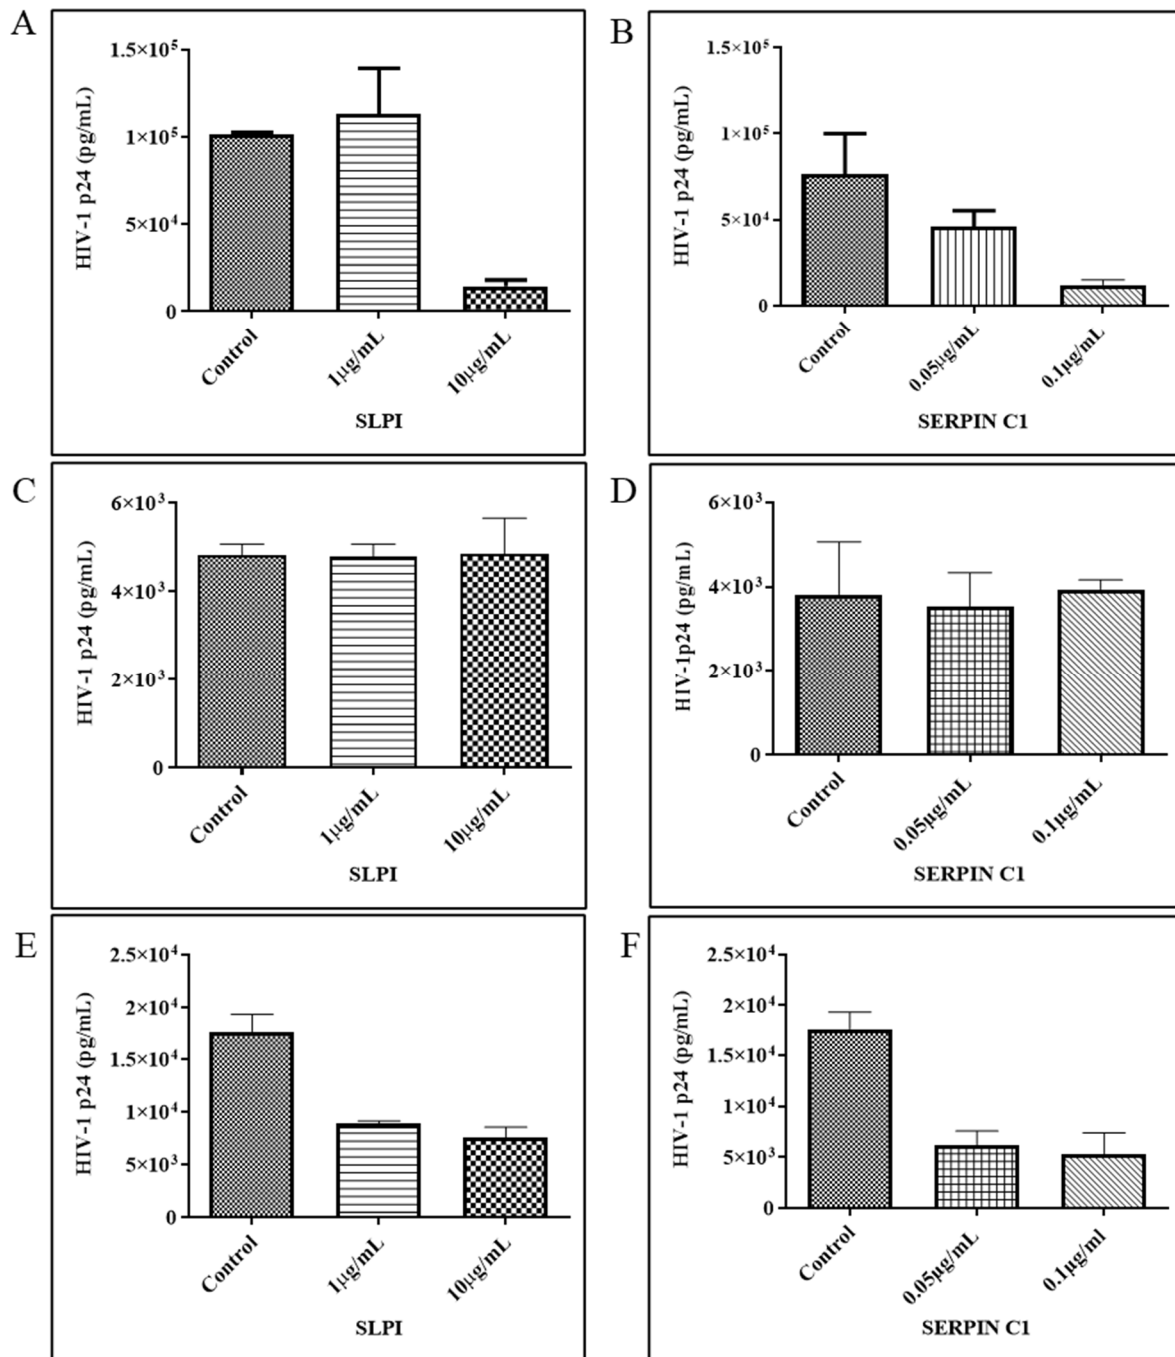

**Figure S5: HIV-1 Replication in Pre-treated MDMs (A & B), Post HIV-1 infected MDMs (C & D) and -MDMs infected with pre-incubated inoculum- (E & F) treated with SLPI and SERPINC1 (Donor 3).**

(A&B) MDMs ( $1 \times 10^6$  cells/well) were pre-treated with (A) SLPI 1  $\mu$ g/ml and 10  $\mu$ g/ml or (B) SERPIN C1 0.05  $\mu$ g/ml and 0.1  $\mu$ g/ml concentration for 3 hours then infected with HIV-1 BaL 5 ng/ml p24 units. After 2 hours the virus was removed, and fresh culture media added with 1  $\mu$ g/ml and 10  $\mu$ g/ml SLPI or 0.05  $\mu$ g/ml and 0.1  $\mu$ g/ml SERPINC1 and cultured. (C&D) MDMs ( $1 \times 10^6$  cells/well) were infected with HIV-1 BaL 5 ng/ml p24 units. After 2 hours the virus was removed, and fresh culture media added with (C) SLPI 1  $\mu$ g/ml and 10  $\mu$ g/ml concentration or (D) SERPIN C1 0.05  $\mu$ g/ml and 0.1  $\mu$ g/ml and cultured the MDMs. (E&F) HIV-1 BaL (5 ng/ml p24 units) was incubated without or with (E) SLPI 1  $\mu$ g/ml and 10  $\mu$ g/ml or (F) SERPIN C1 0.05  $\mu$ g/ml and 0.1  $\mu$ g/ml at 37 °C for 2 h in PBS containing 0.1% BSA. After that, MDMs ( $5 \times 10^5$  cells/well) were infected with HIV-1 BaL and incubated at 37 °C for 2 h for virus adsorption washed with phosphate buffered saline (PBS) and cultured in 2 ml fresh media at 37 °C. Culture supernatants were collected after 7 days post infection and HIV-1 replication quantitated by HIV-1 p24 ELISA. Culture supernatants were analyzed in triplicate. Results expressed as mean  $\pm$  SEM of three independent experimental set up of Donor 3.
