# Supplementary material for: Modulation of HIV Replication in Monocyte-Derived Macrophages (MDM) by Host Antiviral Factors Secretory Leukocyte Protease Inhibitor and Serpin Family C Member 1 Induced by Steroid Hormones
Source: Viruses. 2022 Jan 6;14(1):95. doi: 10.3390/v14010095 (PMC8777669; doi:10.3390/v14010095)
Supplement: Supplementary file 1 [file viruses-14-00095-s001.zip › Supplementary data.xlsx]

## Sheet: Table-S1
Table S1: Average Ct values of host genes expressed in Estrogen or Progesterone Treated MDMs Infected with HIV-1
Symbol	AVG Ct
	Control Group	Estrogen		Progesterone
		40pM	110nM	2.5 nM	64 nM
APEX1	24.33	24.37	24.5	24.38	23.75
APOBEC3F	29.7	29.61	29.78	29.99	29.17
APOBEC3G	29.58	29.48	29.79	29.48	28.94
BAD	26.75	26.65	26.64	26.47	25.93
BANF1	25.05	25.08	25.23	25.01	24.22
BAX	24	24.07	24.38	24.13	23.32
BCL11B	34.92	34.7	34.81	35	32.59
BCL2	29.2	29.08	29.25	29.25	27.52
BTRC	28.41	28.53	28.74	28.47	27.75
CASP3	26.83	26.72	27	26.89	26.19
CASP8	28.98	29.03	29.49	29.2	28.68
CBX5	26.25	26.14	26.42	26.26	25.62
CCL2	21.75	21.59	21.95	21.98	21.26
CCL4	27.7	27.62	27.63	27.52	26.59
CCL5	30.3	30.37	30.3	30.42	29.49
CCL8	26.27	25.87	26.21	26.56	25.83
CCNT1	27.11	27.14	27.3	27.19	26.48
CCR2	34.78	34.18	34.7	34.97	33.26
CCR3	33.24	33.15	33.97	33.56	31.97
CCR4	34.32	34.05	34.1	34.44	31.99
CCR5	25.34	25.28	25.3	25.12	24.57
CD209	28.17	28.03	28.28	28.32	27.78
CD247	32.52	32.24	32.69	33.37	32.57
CD4	23.37	23.26	23.73	23.52	22.71
CD44	21.96	22.09	22.33	22.09	21.41
CD69	34.39	33.79	33.15	34.02	32.48
CD74	18.79	18.82	19.02	19.05	18.48
CDK7	26.98	27.03	27.09	26.94	26.35
CDK9	24.99	25.12	25.44	25.17	24.51
CDKN1A	22.14	22.15	22.4	22.25	21.54
CEBPB	26.97	23.31	23.52	23.36	22.66
COPS6	25.61	25.66	25.82	25.72	24.94
CR2	33.49	32.64	33.81	33.75	31.53
CREBBP	28.45	28.32	28.49	28.59	27.75
CX3CL1	35	34.75	34.91	35	32.67
CXCL12	31.46	31.12	30.46	31.16	29.87
CXCR4	23.59	23.56	23.68	23.52	23.05
ELANE	35	34.76	35	35	32.34
EP300	25.88	25.68	25.96	25.79	25.12
FCAR	34.6	35	34.89	34.77	32.49
FOS	24.98	23.98	24.45	25.19	24.13
GADD45A	29.43	29.2	29.51	29.26	28.23
HCK	24.98	24.86	24.85	24.86	24.13
HMGA1	30.9	30.86	31.02	30.87	29.85
HTATSF1	26.95	26.95	27.17	27.07	26.29
IFNA1	35	34.86	35	34.79	33.05
IFNB1	35	35	35	35	33.15
IFNG	35	35	35	35	33.59
IL10	26.34	26.04	26.54	26.45	25.65
IL12B	34.73	34.64	34.82	35	32.6
IL16	25.69	25.84	25.86	25.74	25.15
IL1B	27.19	27.31	27.74	27.41	26.65
IL2	35	35	35	35	33.64
CXCL8	25.76	25.73	25.51	25.72	24.78
IRF1	28.27	28.34	28.57	28.25	27.44
IRF2	24.66	24.78	24.86	24.84	24.11
KLRD1	33.22	33.22	33.34	33.3	31.31
LTBR	24.62	24.61	24.75	24.7	24.1
MAP3K5	25.43	25.48	25.75	25.39	24.81
MBL2	35	34.9	35	35	32.48
NFATC1	26.39	26.42	26.61	26.5	25.78
NFKBIA	23.86	23.77	23.85	23.74	23.14
PPIA	28.37	28.6	28.79	28.49	27.72
PRDX1	26.1	25.96	26.05	25.93	24.56
PTK2B	26.05	25.95	26.19	25.95	25.36
RBL2	25.76	25.66	25.96	25.72	25.05
SELL	31.59	31.43	31.36	31.46	30.9
SERPINA1	25.74	25.84	26.22	25.66	25.08
SERPINC1	34.27	34.26	33.7	34.75	32.51
SLPI	34.3	34.09	34.3	34.27	32.07
SMARCB1	27.33	27.27	27.44	27.28	26.52
STAT1	25.35	25.34	25.57	25.37	24.8
STAT3	24.56	24.54	24.72	24.62	24.07
TFCP2	27.76	27.68	28	27.78	27.22
TGFB1	22.81	23.03	23.26	23.03	22.38
TNF	28.62	28.46	28.52	28.4	27.59
TNFRSF1B	23.77	23.88	24.25	23.87	23.34
TNFSF10	28.41	28.19	28.62	28.81	28.04
TRIM5	27.08	27.09	27.38	27.1	25.81
TSG101	26.25	26.14	26.31	26.16	25.49
VPS4A	26	26.2	26.37	26.17	25.35
XCL1	35	35	35	35	34.18
XPO1	24.47	24.43	24.7	24.52	23.86
YY1	25	24.99	25.28	25.11	24.51
B2M	18.89	18.73	19	18.87	18.32
HPRT1	27.42	27.3	27.55	27.43	26.7
RPL13A	23.19	23.21	23.29	23.15	22.52
GAPDH	20.94	20.92	21.02	20.96	20.36
ACTB	19.64	19.6	19.87	19.55	19.04
PCR array was performed with experimental RNA samples isolated from MDMs obtained from 3 independent donors and the avarage Ct values were calculated from the three independent donors.

## Sheet: Table-S2
Table S2: Fold Regulation values of host genes expressed in Estrogen or Progesterone Treated MDMs compared with untreated MDMs
Position	Symbol	Estrogen				Progesterone
		40pM		110nM		2.5nM		64nM
		Fold Regulation	SD	Fold Regulation	SD	Fold Regulation	SD	Fold Regulation	SD
A01	APEX1	-1.09	0.066869	-1.11	0.042238	-1.03	0.194401	1.32	0.913777
A02	APOBEC3G	-1.18	0.353759	1.01	0.523496	-1.08	0.543602	1.29	0.750423
A03	BAD	-1.18	0.758167	-1.13	0.769593	-1.20	0.932999	1.18	1.464778
A04	BANF1	-1.13	0.309014	-1.17	0.247803	-1.12	0.159140	1.37	0.938699
A05	BAX	-1.16	0.448590	-1.18	0.406338	-1.14	0.322080	1.25	1.223465
A06	BCL11B	1.28	0.925619	1.10	1.116439	1.01	0.394552	1.42	1.197362
A07	BCL2	1.01	0.566626	-1.01	0.257746	1.07	0.745363	1.61	1.704170
A08	BTRC	-1.05	0.376965	-1.14	0.319837	-1.01	0.323150	1.47	1.294856
A09	CASP3	-1.07	0.391856	-1.06	0.314026	-1.09	0.409322	1.41	1.205730
A10	CASP8	-1.21	0.389442	-1.23	0.419242	-1.34	0.290342	1.25	1.424081
A11	CBX5	1.13	0.242104	-1.02	0.426683	1.01	0.451047	1.67	0.935219
A12	CCL2	1.08	0.620939	1.05	1.108714	-1.11	0.544956	1.39	1.503958
B01	CCL3	1.28	1.068838	1.34	0.874187	1.39	1.268256	1.79	1.380981
B02	CCL4	1.38	1.167518	1.59	0.603605	1.42	1.228146	1.94	1.330369
B03	CCL5	1.06	2.875420	-1.11	2.545084	1.09	1.944654	1.54	2.068672
B04	CCL8	-1.30	1.054224	-1.24	1.076746	-1.45	0.394552	-1.14	0.963892
B05	CCNT1	-1.20	0.775847	1.01	0.361513	1.02	0.195870	1.34	1.211084
B06	CCR2	-1.59	1.166258	1.06	1.952674	1.43	0.659486	3.17	1.347966
B07	CCR3	-1.58	0.976748	-1.14	1.219005	-1.25	0.951669	1.21	1.230832
B08	CCR4	1.24	0.939649	1.22	0.988521	1.00	0.394552	1.46	1.273394
B09	CCR5	-1.01	0.987234	-1.04	0.876170	-1.05	0.867256	1.40	1.619451
B10	CD209	1.19	0.944772	1.29	0.759227	1.13	0.928343	1.86	1.692211
B11	CD247	-1.73	0.977140	-1.64	1.429197	-1.35	0.488953	1.05	0.836149
B12	CD4	1.08	0.861721	-1.10	0.945864	-1.26	1.234444	1.22	1.830423
C01	CD44	-1.06	0.646457	-1.13	0.568244	-1.14	0.521841	1.28	1.334165
C02	CD69	-1.21	1.374740	-1.09	1.840470	-1.50	0.259454	-1.09	1.463162
C03	CD74	1.02	0.406262	-1.06	0.511245	-1.14	0.584276	1.42	1.353747
C04	CDK7	-1.11	0.291142	-1.09	0.304248	-1.06	0.240029	1.33	0.907408
C05	CDK9	-1.15	0.518511	-1.28	0.207358	-1.14	0.340507	1.30	1.275234
C06	CDKN1A	-1.10	0.316646	-1.03	0.361374	1.07	0.108432	1.45	0.949339
C07	CEBPB	-1.29	0.914194	-1.30	0.586950	-1.14	0.758551	1.16	1.575206
C08	COPS6	-1.23	0.224388	-1.24	0.156538	-1.09	0.099648	1.21	0.998506
C09	CR2	-1.18	1.263169	-1.04	0.973787	-1.03	0.975495	1.85	1.529488
C10	CREBBP	-1.26	0.776731	-1.34	0.461809	-1.09	0.228152	1.32	1.446987
C11	CX3CL1	-1.25	1.495620	-1.05	1.875956	-1.13	1.762837	1.16	1.583863
C12	CXCL12	-1.28	1.254547	-1.35	1.313859	-1.83	0.839770	-1.09	1.228320
D01	CXCR4	1.12	0.522796	1.10	0.400596	1.00	0.409948	1.33	1.256092
D02	ELANE	1.27	0.839091	1.42	0.988423	-1.43	0.395047	1.08	0.753850
D03	EP300	-1.26	0.806449	-1.13	0.431229	-1.03	0.168958	1.39	1.147416
D04	FCAR	-1.07	0.901308	-2.13	1.675061	-2.40	0.586494	-1.76	1.127591
D05	FOS	-1.17	1.453101	-1.24	1.567566	-1.28	1.339858	1.23	1.524897
D06	GADD45A	1.02	0.742407	1.04	0.540017	-1.04	0.468600	1.50	1.560779
D07	HCK	-1.09	0.150542	-1.11	0.045636	-1.02	0.186045	1.38	0.857501
D08	HTATSF1	-1.44	1.448541	-1.62	0.802751	1.18	0.881171	1.44	2.193194
D09	IFNA1	-1.15	0.210512	-1.14	0.209823	-1.07	0.253586	1.47	0.912163
D10	IFNB1	-1.04	0.439020	-1.05	0.880471	-1.41	1.384823	-1.25	1.373618
D11	IFNG	-1.08	1.089149	-1.35	1.082365	-1.52	0.394552	-1.11	0.843206
D12	IL10	-1.12	1.054224	-1.14	1.116439	-1.25	0.394552	1.02	0.963892
E01	IL12B	-1.04	0.555503	-1.26	0.670419	-1.19	0.302815	1.48	1.065390
E02	IL16	2.43	2.886196	2.47	2.658356	1.62	2.818175	2.45	3.540485
E03	IL1B	-1.16	0.345682	-1.12	0.340658	-1.23	0.792025	1.34	0.761581
E04	IL2	-1.31	1.238218	-1.47	1.333930	-1.66	0.517137	-1.09	1.567287
E05	CXCL8	-1.16	1.054224	-1.17	1.116439	-1.29	0.394552	-1.01	0.963892
E06	IRF1	1.03	1.365429	1.10	1.286497	1.02	1.448846	1.21	1.847817
E07	IRF2	-1.25	0.624876	-1.24	0.601170	-1.22	0.681646	1.15	1.665596
E08	KLRD1	-1.10	0.219465	-1.16	0.180312	-1.10	0.174270	1.32	1.127211
E09	LTBR	-1.57	1.054224	-1.59	1.116439	-1.72	0.402154	-1.38	0.963892
E10	MAP3K5	-1.05	0.565345	-1.11	0.321860	-1.06	0.421843	1.32	1.179319
E11	MBL2	-1.01	0.586024	-1.18	0.638428	-1.01	0.341847	1.56	0.970403
E12	NFATC1	-1.24	1.054224	-1.26	1.116439	-1.38	0.394552	-1.09	0.963892
F01	NFKB1	-1.08	0.401084	-1.03	0.318099	1.04	0.662484	1.46	1.324915
F02	NFKBIA	-1.06	0.260837	-1.05	0.275795	1.02	0.349363	1.48	0.851795
F03	PPIA	-1.15	0.655676	-1.09	0.643450	1.06	0.755319	1.36	0.713397
F04	PRDX1	-1.02	0.585923	1.03	0.490078	1.26	0.656744	1.73	0.887904
F05	PTK2B	-1.26	0.477693	-1.25	0.530998	1.10	0.719445	1.51	1.027056
F06	RBL2	-1.24	0.304439	-1.22	0.302237	-1.14	0.165274	1.36	1.032000
F07	SELL	-1.04	0.987755	1.02	0.775698	-1.18	0.724404	1.37	1.621771
F08	SERPINA1	1.36	1.246729	1.17	1.044611	1.07	1.467161	1.64	1.653061
F09	SERPINC1	-1.13	0.900599	1.56	1.162595	-1.19	0.435676	1.30	1.305427
F10	SLPI	-1.32	0.933073	-1.39	1.356672	1.03	1.061137	-1.08	0.965883
F11	SMARCB1	-1.22	0.445225	-1.25	0.272174	-1.28	0.410859	1.21	1.280131
F12	STAT1	-1.17	0.502548	-1.23	0.427762	-1.11	0.656556	1.34	1.356854
G01	STAT3	-1.07	0.348256	-1.05	0.102469	1.00	0.233543	1.47	1.153066
G02	TFCP2	-1.13	0.180356	-1.19	0.173061	-1.17	0.251697	1.46	1.148397
G03	TGFB1	-1.18	0.675541	-1.23	0.474783	-1.14	0.569877	1.26	1.383940
G04	TNF	-1.18	0.726066	-1.13	0.408430	-1.09	0.491241	1.30	1.008403
G05	TNFRSF1B	-1.13	1.156523	-1.18	0.734146	-1.19	1.036187	1.16	1.843634
G06	TNFSF10	-1.04	0.367713	-1.24	0.154574	-1.52	0.415526	1.58	1.132869
G07	TRIM5	-1.31	0.597721	-1.29	0.211057	-1.38	0.450632	1.25	1.290026
G08	TSG101	-1.07	0.417230	-1.04	0.569270	1.03	0.469476	1.35	0.920855
G09	VPS4A	-1.18	0.597413	-1.27	0.417837	-1.18	0.531695	1.21	1.434746
G10	XCL1	-1.12	1.054224	-1.14	1.116439	-1.24	0.394552	1.02	0.963892
G11	XPO1	-1.15	0.531156	-1.09	0.551548	-1.06	0.417091	1.43	0.764051
G12	YY1	-1.15	0.416111	-1.16	0.352205	-1.10	0.277670	1.35	1.026187
H01	ACTB	-1.05	0.092604	-1.11	0.138452	-1.12	0.221967	1.33	0.916570
H02	B2M	1.10	0.382757	1.13	0.361684	1.11	0.316722	1.46	0.992827
H03	GAPDH	-1.00	0.417099	-1.04	0.400273	-1.08	0.375690	1.29	0.930862
H04	HPRT1	-1.03	0.187553	1.00	0.082699	1.06	0.148607	-3.48	3.492930
H05	RPLP0	-1.01	0.317937	1.02	0.353505	1.02	0.543832	1.39	0.939398
PCR array was performed with experimental RNA samples isolated from MDMs obtained from 4 independent donors and the fold regulation and standard deviation values were calculated from the four independent donors.
